# Supplementary material for: Metagenomic Analysis of DNA Viruses with Targeted Sequence Capture of Canine Lobular Orbital Adenomas and Normal Conjunctiva
Source: MDPI journal article supplement (doi:10.3390/microorganisms11051163), 2023-04-28
Supplement: s1 [file s1]

## Supplementary Information

### *Index hopping resulting in misalignment*

The samples in this study were sequenced on the HiSeq4000 with Exclusion Amplification (ExAmp) chemistry. Index hopping is known to occur at a higher rate on sequencing platforms that use ExAmp technology versus the traditional cyclical bridge-PCR of random clustering for cluster generation [1]. Index hopping occurs due to free barcoded adapter/index primers present in a multiplexed library pool. The free adapter can prime and extend reads in the same lane during the clustering step. The index hopped and extended strand is then free to seed another nanowell. This leads to mis-assignment of reads and the appearance of contamination. Index hopping mostly affects ExAmp workflows because ExAmp relies on cluster growth proceeding at a faster rate than cluster seeding instead of the wash step after read binding in bridge amplification. Index hopping can occur on average in 1% of reads [1]. In this study, the contaminating reads for each sample and virus were <0.1% of the total reads for each virus in the sequencing pool. Based on previous studies [2-5] these findings suggest that read misalignment occurred due to index swapping and occurred due to the exponentially higher levels of viral DNA in the positive control samples compared to the low input of the CLOA and negative control libraries and the low diversity of the input libraries.

Table S1: Patient characteristics and read information for each sample that was sequenced

| # | Patient | Species | Breed               | Age (years) | Sex    | Lesion | Tissue Type <sup>a</sup> | Location <sup>b</sup> | Year Collected | Other Clinical Information | Viral reads <sup>c</sup> |
|---|---------|---------|---------------------|-------------|--------|--------|--------------------------|-----------------------|----------------|----------------------------|--------------------------|
| 1 | CLOA1   | Canine  | Golden Retriever    | 12          | MI     | CLOA   | FFPE                     | OS                    | 2002           | N/A                        | 25,957                   |
| 2 | CLOA2   | Canine  | Shepherd mix        | 10          | M<br>N | CLOA   | FFPE                     | OD                    | 2003           | N/A                        | 14,409                   |
| 3 | CLOA3   | Canine  | German Shepherd mix | 8           | FS     | CLOA   | FFPE                     | OS                    | 2003           | N/A                        | 3840                     |

|    |        |        |                          |     |        |      |      |    |      |                                                                         |        |
|----|--------|--------|--------------------------|-----|--------|------|------|----|------|-------------------------------------------------------------------------|--------|
| 4  | CLOA4  | Canine | Samoyed                  | 11  | M<br>N | CLOA | FFPE | OD | 2005 | N/A                                                                     | 25,057 |
| 5  | CLOA5  | Canine | Labrador<br>Retriever    | 11  | M<br>N | CLOA | FFPE | OS | 2005 | N/A                                                                     | 23,334 |
| 6  | CLOA6  | Canine | Boston Terrier           | 8   | FS     | CLOA | FFPE | OS | 2007 | N/A                                                                     | 16,257 |
| 7  | CLOA7  | Canine | Labrador<br>Retriever    | 14  | FS     | CLOA | FFPE | OD | 2007 | N/A                                                                     | 23,322 |
| 8  | CLOA8  | Canine | Bichon Frise             | 12  | FS     | CLOA | FFPE | OS | 2007 | N/A                                                                     | 28,670 |
| 9  | CLOA9  | Canine | Labrador<br>Retriever    | 7   | FS     | CLOA | FFPE | OD | 2007 | N/A                                                                     | 30,838 |
| 10 | CLOA10 | Canine | Labrador<br>Retriever    | 8.3 | M<br>N | CLOA | FFPE | OS | 2008 | N/A                                                                     | 25,659 |
| 11 | CLOA11 | Canine | Dalmatian                | -   | -      | CLOA | FFPE | OD | 2008 | N/A                                                                     | 25,225 |
| 12 | CLOA12 | Canine | Australian<br>Cattle Dog | 6   | FS     | CLOA | FFPE | OD | 2009 | N/A                                                                     | 6096   |
| 13 | CLOA13 | Canine | Samoyed                  | 11  | FS     | CLOA | FFPE | OS | 2009 | N/A                                                                     | 41,506 |
| 14 | CLOA14 | Canine | Shih Tzu                 | 9   | FS     | CLOA | FFPE | OS | 2009 | N/A                                                                     | 26,233 |
| 15 | CLOA15 | Canine | Mix                      | 16  | M<br>N | CLOA | FFPE | OD | 2010 | N/A                                                                     | 26,505 |
| 16 | CLOA16 | Canine | Shih Tzu                 | 10  | FS     | CLOA | FFPE | OS | 2010 | N/A                                                                     | 4794   |
| 17 | CLOA17 | Canine | Cockapoo                 | 8.5 | FS     | CLOA | FFPE | OS | 2010 | N/A                                                                     | 15,259 |
| 18 | CLOA18 | Canine | Labrador<br>Retriever    | 12  | FS     | CLOA | FFPE | OS | 2011 | N/A                                                                     | 48,420 |
| 19 | CLOA19 | Canine | Labrador<br>Retriever    | -   | M<br>N | CLOA | FFPE | OS | 2011 | N/A                                                                     | 3561   |
| 20 | CLOA20 | Canine | Samoyed                  | 10  | FS     | CLOA | FFPE | OS | 2011 |                                                                         | 19,334 |
| 21 | CLOA21 | Canine | Toy Poodle               | 12  | M<br>N | CLOA | FFPE | OD | 2012 | Vaccinated for<br>parvo and<br>distemper, did not<br>live w/ other pets | 42,501 |
| 22 | CLOA22 | Canine | Boston Terrier           | 13  | FS     | CLOA | FFPE | OD | 2012 | N/A                                                                     | 27,442 |
| 23 | CLOA23 | Canine | Samoyed                  | 13  | FS     | CLOA | FFPE | OD | 2012 | N/A                                                                     | 19,185 |

|    |        |        |                                 |    |        |                |      |                |      |     |            |
|----|--------|--------|---------------------------------|----|--------|----------------|------|----------------|------|-----|------------|
| 24 | CLOA24 | Canine | Labrador Retriever              | 11 | FS     | CLOA           | FFPE | OS             | 2012 | N/A | 28,572     |
| 25 | CLOA25 | Canine | Labrador Retriever              | 8  | FS     | CLOA           | FFPE | OS             | 2012 | N/A | 27,181     |
| 26 | CLOA26 | Canine | Shih Tzu                        | 12 | FS     | CLOA           | FFPE | OS, OD         | 2012 | N/A | 36,317     |
| 27 | CLOA27 | Canine | Miniature Poodle mix            | 9  | M<br>N | CLOA           | FFPE | OS, OD         | 2013 | N/A | 33,507     |
| 28 | CLOA28 | Canine | Mix                             | 10 | FS     | CLOA           | FFPE | OD             | 2013 | N/A | 40,242     |
| 29 | CLOA29 | Canine | Golden Doodle                   | 10 | M<br>N | CLOA           | FFPE | OU (OD)        | 2016 | N/A | 64,801     |
| 30 | CLOA30 | Canine | Cockapoo                        | 13 | FS     | CLOA           | FFPE | OS             | 2016 | N/A | 33,687     |
| 31 | CLOA31 | Canine | Mix                             | 11 | FS     | CLOA           | FFPE | OS, OD         | 2007 | N/A | 28,972     |
| 32 | PV1    | Equine | -                               | 8  | MC     | Sarcoid        | FFPE | Medial canthus | 2012 | N/A | 90,006     |
| 33 | PV2    | Canine | Labrador Retriever              | 10 | FS     | Papilloma      | FF   | Footpad        | 2017 | N/A | 72,626,435 |
| 34 | PV3    | Canine | Mastiff                         | F  | 2      | Papilloma      | FFPE | Skin           | 2011 | N/A | 8,209,598  |
| 35 | PV4    | Canine | Golden Retriever                | M  | 5      | Papilloma      | FFPE | Lip            | 2012 | N/A | 28,014,256 |
| 36 | NC1    | Canine | Pitbull Terrier Mix             | F  | ~3     | Normal control | FF   | Conjunctiva    | 2017 | N/A | 578        |
| 37 | NC2    | Canine | Shepherd/Pitbull mix            | F  | ~4     | Normal control | FF   | Conjunctiva    | 2017 | N/A | 440        |
| 38 | NC3    | Canine | Pitbull mix                     | -  | ~5     | Normal control | FF   | Conjunctiva    | 2017 | N/A | 2996       |
| 39 | NC4    | Canine | Shepherd/Labrador retriever mix | -  | ~3     | Normal Control | FF   | Conjunctiva    | 2017 | N/A | 530        |
| 40 | NC5    | Canine | Mix                             | -  | -      | Normal Control | FF   | Conjunctiva    | 2017 | N/A | 540        |

|    |      |        |                                   |    |    |                   |    |                 |      |                                                                        |     |
|----|------|--------|-----------------------------------|----|----|-------------------|----|-----------------|------|------------------------------------------------------------------------|-----|
| 41 | NC6  | Canine | Lab/Shepherd/<br>Greyhound<br>mix | F  | 9  | Normal<br>Control | FF | Conjuncti<br>va | 2017 | History of<br>Addison's disease                                        | 663 |
| 42 | NC7  | Canine | Jack Russell<br>Terrier Mix       | -  | ~2 | Normal<br>Control | FF | Conjuncti<br>va | 2017 | N/A                                                                    | 269 |
| 43 | NC8  | Canine | Bouveir Des<br>Flandres           | FS | 12 | Normal<br>Control | FF | Conjuncti<br>va | 2017 | Metastatic<br>hemangiosarcoma<br>, Chemodectoma                        | 866 |
| 44 | NC9  | Canine | Shepherd Mix                      | -  | ~7 | Normal<br>Control | FF | Conjuncti<br>va | 2017 | N/A                                                                    | 725 |
| 45 | NC10 | Canine | Golden<br>Retriever               | MC | 8  | Normal<br>Control | FF | Conjuncti<br>va | 2017 | Duodenal<br>plasmacytoma,<br>megaesophagus,<br>aspiration<br>pneumonia | 764 |

<sup>a</sup>Formalin fixed paraffin embedded (FFPE) or fresh frozen (FF)

<sup>b</sup>OS=left eye; OD= right eye

- Data unavailable

<sup>c</sup>Nt and nr reads

Table S2: Comparison of papillomavirus detection techniques with conventional PCR, IHC and ViroCap for positive control samples

| Species | Sample | Lesion    | FAP59/64<br>PCR | IHC <sup>a</sup>              | ViroCap | Comments                                           |
|---------|--------|-----------|-----------------|-------------------------------|---------|----------------------------------------------------|
| Equine  | PV1    | Sarcoid   | +               | -<br>Melanin in<br>epithelium | +       | BPV-1                                              |
| Canine  | PV2    | Papilloma | +               | +                             | +       | CPapV-2. PCR typing done at Georgetown University. |
| Canine  | PV3    | Papilloma | -               | +                             | +       | CPapV-6                                            |
| Canine  | PV4    | Papilloma | +               | +                             | +       | CPapV-1                                            |

<sup>a</sup>IHC: L1 stain

Table S3: FAP59/64 primer sequences and PCR conditions

| Primer             | Sequence                 | Amplicon | Conditions                                                                                                  |
|--------------------|--------------------------|----------|-------------------------------------------------------------------------------------------------------------|
| FAP59<br>(forward) | TAACWGTNGGNCA YCCWTATT   | 480 bp   | 94°C 10 min,<br>45 cycles of:<br>94°C 1.5 min, 50°C 1.5 min, and 72°C 1.5 min<br>Final extension 72°C 5 min |
| FAP64<br>(reverse) | CCWATATCWVH CATNTCNCCATC |          |                                                                                                             |

Degenerate nucleotides: H = A, T, or C; N = A, G, C, or T; V = A, C or G; W = A or T; Y = C or T.

Final concentrations of the reaction products were  $\times 1$  PCR buffer, 1.5mM MgCl<sub>2</sub>, 200  $\mu$ M dNTP, 0.25 $\mu$ M of each primer, 1.25 U platinum Taq DNA polymerase (Invitrogen Corporation, Carlsbad, CA, USA) and 50ng template DNA in a final reaction volume of 50 $\mu$ L.

Table S4: Parvovirus and Merkel Cell Polyomavirus primer sequences PCR conditions

| Primer                    | Sequence                 | Amplicon | Conditions                                                                                                  | PCR Reaction                                                                                                                                                                                                                                            |
|---------------------------|--------------------------|----------|-------------------------------------------------------------------------------------------------------------|---------------------------------------------------------------------------------------------------------------------------------------------------------------------------------------------------------------------------------------------------------|
| VP2                       |                          |          |                                                                                                             |                                                                                                                                                                                                                                                         |
| 2655F*                    | CCAGATCATCCATCAACATCA    | 857 bp   | 98°C for 30 sec<br>35 cycles of:<br>98°C 10 sec, 62°C 30 sec, and 72°C 30 sec<br>Final extension 72°C 5 min | Final concentrations of the reaction products were 1x Phusion PCR buffer (cat #F530S; Thermo Scientific, USA), 0.2 mM dNTP, 0.5µM of each primer, 0.2 U Phusion High Fidelity DNA polymerase and 0.5ul template DNA in a final reaction volume of 20µL. |
| 3511R*                    | TGAACATCATCTGGATCTGTACC  |          |                                                                                                             |                                                                                                                                                                                                                                                         |
| 3381F*                    | CCATGGAAACCAACCATAACC    | 736 bp   |                                                                                                             |                                                                                                                                                                                                                                                         |
| 4116R*                    | AGTTAATTCCTGTTTTACCTCCAA |          |                                                                                                             |                                                                                                                                                                                                                                                         |
| Large and Small T Antigen |                          |          |                                                                                                             |                                                                                                                                                                                                                                                         |
| LT3F                      | TTGTCTCGCCAGCATTGTAG     | 308 bp   | 95°C for 10 mins<br>40 cycles of:<br>95°C 15 sec, 56°C 1 min                                                | Final concentrations of the reaction products<br>TB Green Advantage Premix (cat #639676; Takara Bio, USA)<br>10 ul, 10µM of each primer, 100ng template DNA in a final reaction volume of 20µL.                                                         |
| LT3R                      | ATATAGGGGCCTCGTCAACC     |          |                                                                                                             |                                                                                                                                                                                                                                                         |

\*These primers allow differentiation between FPLV and CParvoV (overlapping fragments that amplify entire 1755 nucleotide VP2 region)

Table S5: Canine patients with parvovirus detected with ViroCap. Coverage metrics and closest parvovirus strain information are presented.

| Sample | Read Count <sup>a</sup> | Closest match (GenBank Accession) <sup>b</sup>                       | DoC  | BoC   | Comments on coverage                                    | Form   | Comments                                            |
|--------|-------------------------|----------------------------------------------------------------------|------|-------|---------------------------------------------------------|--------|-----------------------------------------------------|
| NC3    | 466                     | Canine parvovirus 2a strain CParvoV-YH, complete genome (KY403998.1) | 12x  | 0.76% | Hairpin at the 3' end <sup>c</sup>                      | Linear | 4923 bp genome. Deposited into GenBank as MZ647470. |
| CLOA21 | 272                     | Mink enteritis virus strain MEV-L, complete genome (KT899746.1)      | 7x   | 0.46% | Gaps in coverage in VP2, 3714-3784 bp and 4092-4157 bp. | Linear | Also close match to feline panleukopenia virus.     |
| NC4    | 37                      | CParvoV-2b (EU659119.1)                                              | 1x   | 0%    | Gaps throughout                                         | N/A    | N/A                                                 |
| CLOA2  | 47                      | Too few reads. Most consistent with MEV or FPLV                      | 1.2x | 0%    | Gaps throughout                                         | N/A    | Not detected with PCR                               |

<sup>a</sup>Reads that primarily mapped to the specified virus. Counts reported after deduplication with Picard.

<sup>b</sup>Closest match was determined by Sanger and Illumina sequencing

<sup>c</sup> The CParvoV-2a virus identified in NC3 contained reads in the 3' end of the genome that were in the inverted orientation. This is likely due to the rolling hairpin replication that occurs in parvovirus.

Table S6: Read counts for papillomavirus positive controls across all samples. One sample, PV4, had a read count that was above the 0.1% threshold and misalignment was suspected.

| Virus                           | Total read count (ViroMatch) | Source of the CPapV | 0.1% read threshold | Samples with CPapV reads above the threshold for contamination |
|---------------------------------|------------------------------|---------------------|---------------------|----------------------------------------------------------------|
| Lambdapapillomavirus 2, CPapV-1 | 28,004,588                   | PV4                 | 28,005              | None                                                           |
| Taupapillomavirus, CPapV-2      | 73,043,821                   | PV2                 | 73,044              | None                                                           |
| Lambdapapillomavirus 3,         | 8,167,726                    | PV3                 | 8168                | PV4 <sup>a</sup>                                               |

|                              |        |     |    |      |
|------------------------------|--------|-----|----|------|
| CPapV-6                      |        |     |    |      |
| Deltapapillomavirus 4, BPV-1 | 60,281 | PV1 | 60 | None |

<sup>a</sup> This was most likely a false positive since this sample was used in a previous study and CPapV-6 was not found in this sample [6]. Also, the genome of CPapV-6 identified in PV4 in this study was identical to the virus identified in PV3 and thus consistent with misalignment

Table S7: Coverage metrics and papillomavirus strains that were detected with ViroCap in the positive control samples

| Sample | PV                      | GenBank Accession | Genera   | Read count <sup>a</sup> | DoC     | BoC    | Physical form |
|--------|-------------------------|-------------------|----------|-------------------------|---------|--------|---------------|
| PV2    | Canine papillomavirus 2 | MW881228          | Tau      | 3,917,290               | 71,340x | 100%   | Circularized  |
| PV4    | Canine papillomavirus 1 | KY825186.1        | Lambda 2 | 2,300,847               | 37,928X | 100%   | Circularized  |
| PV1    | Bovine papillomavirus 1 | KY886226.1        | Delta    | 22,054                  | 408x    | 82.25% | Circularized  |
| PV3    | Canine papillomavirus 6 | KY802017          | Lambda   | 1,209,109               | 20,761x | 100%   | Circularized  |

<sup>a</sup>Reads that primarily mapped to the specified virus. Counts reported after deduplication with Picard.

Table S8: Novel complete canine papillomavirus 2 genome discovered by ViroCap

| Sample | New Genome Name                                                      | GenBank Accession | Genome Size | Closest relative (GenBank Accession) | Genera | % Analogous (genome) <sup>a</sup> | SBS <sup>b</sup> | Indels |
|--------|----------------------------------------------------------------------|-------------------|-------------|--------------------------------------|--------|-----------------------------------|------------------|--------|
| PV2    | Canine papillomavirus 2, isolate Missouri, Isabelle, complete genome | MW881228          | 8101        | NC_006564.1                          | Tau    | 99.99%                            | 1                | 0      |

<sup>a</sup>Percentage analogous was calculated with Clustal Omega

<sup>b</sup>Single base substitutions

<sup>c</sup>Reads that primarily mapped to the specified virus. Counts reported after deduplication with Picard.

Table S9: Variants and predicted functional outcome in the novel papillomavirus strain (GenBank MW881228) detected in PV2 compared to the reference canine papillomavirus 2 genome (NC\_006564.1)

| Strain                                                     | Nucleotide variant | Genomic Position | Gene | Amino Acid Variant | Variant Type   | Domain/Feature | Provean variant score | Predicted Consequence |
|------------------------------------------------------------|--------------------|------------------|------|--------------------|----------------|----------------|-----------------------|-----------------------|
| Canine papillomavirus 2, isolate Missouri, complete genome | A→G                | 7046             | L1   | K282R              | Non-synonymous | N/A            | -0.426                | Neutral               |

Table S10: Canine patients with Merkel cell polyomavirus detected with ViroCap. Coverage metrics and closest Merkel cell polyomavirus strain information are presented.

| Patients | Read Count <sup>a</sup> | Closest match (GenBank Accession) | DoC  | BoC   | Comments on coverage | Form         |
|----------|-------------------------|-----------------------------------|------|-------|----------------------|--------------|
| CLOA3    | 20                      | NC_010277.2                       | 0.5x | 0%    | Gaps throughout      | Circularized |
| CLOA31   | 50                      | HM011538.1                        | 1.4x | 3.69% | Gaps throughout      | Circularized |
| CLOA1    | 35                      | NC_010277.2                       | 0.9x | 0%    | Gaps throughout      | Circularized |
| PV3      | 32                      | HM011538.1                        | 0.9x | 0%    | Gaps throughout      | Circularized |
| CLOA7    | 14                      | NC_010277.2                       | 0.4x | 0%    | Gaps throughout      | N/A          |
| CLOA21   | 4                       | NC_010277.2                       | 0.1x | 0%    | Gaps throughout      | N/A          |
| CLOA14   | 6                       | NC_010277.2                       | 0.2x | 0%    | Gaps throughout      | N/A          |
| CLOA24   | 10                      | NC_010277.2                       | 0.3x | 0%    | Gaps throughout      | N/A          |
| CLOA13   | 12                      | NC_010277.2                       | 0.3x | 0%    | Gaps throughout      | N/A          |
| CLOA19   | 6                       | NC_010277.2                       | 0.2x | 0%    | Gaps throughout      | N/A          |
| NC9      | 4                       | NC_010277.2                       | 0.1x | 0%    | Gaps throughout      | N/A          |
| CLOA17   | 6                       | NC_010277.2                       | 0.2x | 0%    | Gaps throughout      | N/A          |
| NC6      | 2                       | NC_010277.2                       | 0.1x | 0%    | Gaps throughout      | N/A          |
| CLOA22   | 2                       | NC_010277.2                       | 0.2x | 0%    | Gaps throughout      | N/A          |

<sup>a</sup>Reads that primarily mapped to the specified virus. Counts reported after deduplication with Picard.

Figure S1: Aligned reads from the positive control sample PV2 that aligned to CPapV-2 (GenBank NC\_006564.1) after deduplication are shown. This strain was deposited into GenBank as MW881228, Canine Papillomavirus 2, isolate Missouri, Isabelle, complete genome. Colored vertical lines on the grey coverage track represent single nucleotide variants compared with the reference.

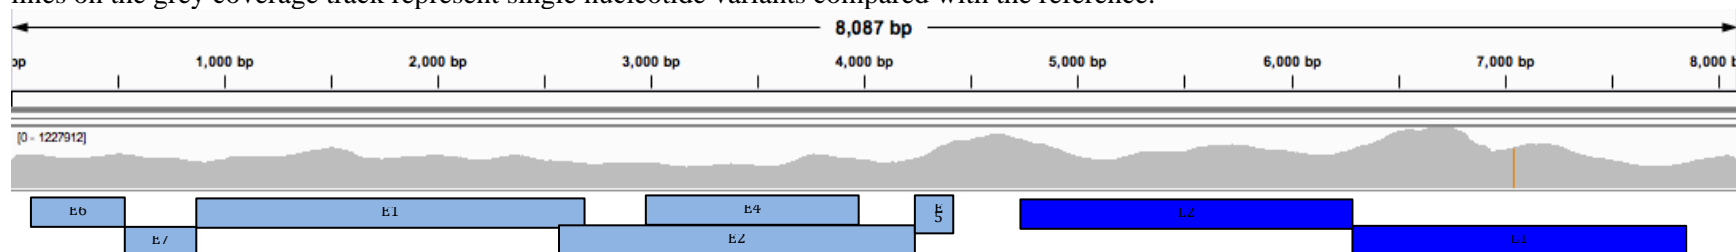

Figure S2: CLOA31 had the most reads that aligned to Merkel Cell Polyomavirus but the DoC and BoC were low. The 5343 bp Merkel Cell Polyomavirus (GenBank NC\_010277.2) genome is annotated and shown above the reads that aligned to this genome. GP1 is the VP2 capsid protein. GP2 is the VP1 major capsid protein. GP3 is the large T antigen. The gene in the far right is the small T antigen.

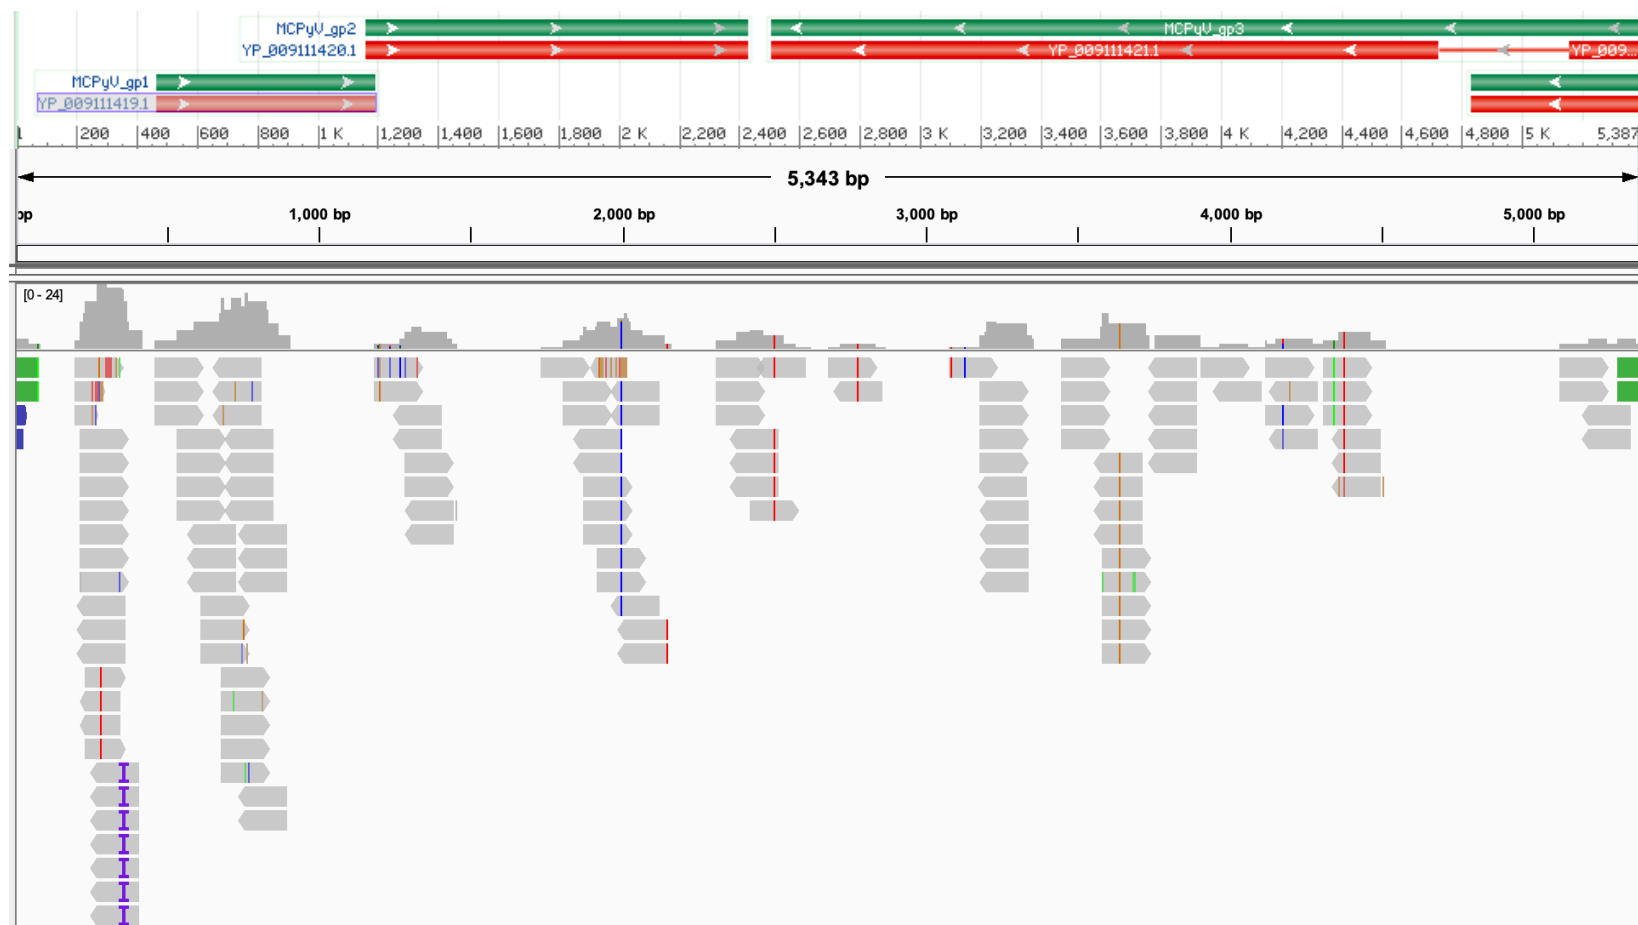

Figure S3: Merkel Cell Polyomavirus was detected by PCR and Sanger sequencing in the samples that contained the highest ViroCap Merkel Cell Polyomavirus read counts. The LT3 primer set was used. The PCR product was visualized on an 1% agarose gel as a 308 bp band. Lane 1: 100 bp ladder; lane 2: no template control; lanes 3-4: CLOA31 gDNA; lanes 5-6: CLOA31 library; lane 7: Merkel Cell Polyomavirus plasmid pcDNA6.TAg206.V5(2B4); lane 8: Merkel Cell Polyomavirus plasmid pcDNA3.MCV339 (144-3696); lanes 9-10: CLOA1 gDNA; lanes 11-12: CLOA3 gDNA that was submitted for library production and sequencing; lanes 13-14: CLOA3 gDNA that was not submitted for library production and sequencing; lanes 15-16: PV3 gDNA. These amplicons were subsequently sequenced via Sanger sequencing and confirmed the presence of Merkel Cell Polyomavirus in lanes 7-8 (Merkel Cell Polyomavirus positive control plasmids), lane 5 (CLOA31 library), lane 12 (CLOA3 gDNA submitted sample) and lanes 15-16 (PV3 gDNA).

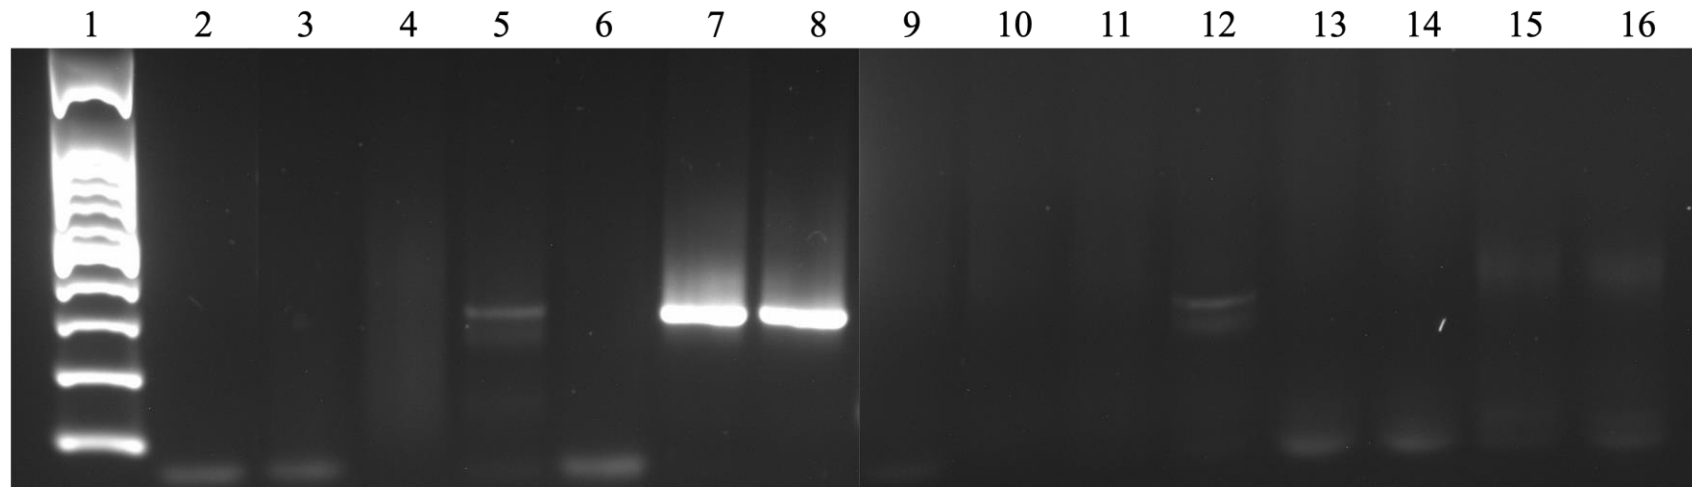

## References

1. Costello, M.; Fleharty, M.; Abreu, J.; Farjoun, Y.; Ferriera, S.; Holmes, L.; Granger, B.; Green, L.; Howd, T.; Mason, T.; et al. Characterization and remediation of sample index swaps by non-redundant dual indexing on massively parallel sequencing platforms. *BMC Genomics* **2018**, *19*, 332, doi:10.1186/s12864-018-4703-0.
2. Wylie, K.M.; Wylie, T.N.; Buller, R.; Herter, B.; Cannella, M.T.; Storch, G.A. Detection of Viruses in Clinical Samples by Use of Metagenomic Sequencing and Targeted Sequence Capture. *J Clin Microbiol* **2018**, *56*, doi:10.1128/JCM.01123-18.
3. Kircher, M.; Sawyer, S.; Meyer, M. Double indexing overcomes inaccuracies in multiplex sequencing on the Illumina platform. *Nucleic Acids Res* **2012**, *40*, e3, doi:10.1093/nar/gkr771.
4. Kircher, M.; Heyn, P.; Kelso, J. Addressing challenges in the production and analysis of illumina sequencing data. *BMC Genomics* **2011**, *12*, 382, doi:10.1186/1471-2164-12-382.
5. Sinha R, S.G., Gulati GS, Ezran C, Travaglini KJ, Wei E, Chan CKF, Nabhan AN, Su T, Morganti RM, Conley SD, Chaib H, Red-Horse K, Longaker MT, Snyder MP, Krasnow MA, Weissman IL. Index switching causes "spreading-of-signal" among multiplexed samples in Illumina HiSeq 4000 DNA sequencing. *bioRxiv* **2017**, doi:http://dx.doi.org/10.1101/125724.
6. Chu, S.; Wylie, T.N.; Wylie, K.M.; Johnson, G.C.; Skidmore, Z.L.; Fleer, M.; Griffith, O.L.; Bryan, J.N. A virome sequencing approach to feline oral squamous cell carcinoma to evaluate viral causative factors. *Vet Microbiol* **2020**, *240*, 108491, doi:10.1016/j.vetmic.2019.108491.
